# Supplementary material for: Communicating Microbiology Concepts from Multiple Contexts through Poster Presentations
Source: PubMed Central journal article supplement — J Microbiol Biol Educ. 2018 Mar 30;19(1):19.1.20. doi: 10.1128/jmbe.v19i1.1399 (PMC5969407; doi:10.1128/jmbe.v19i1.1399), 2018-03-30
Supplement: JMBE-19-20-s001.pdf [file JMBE-19-20-s001.pdf]

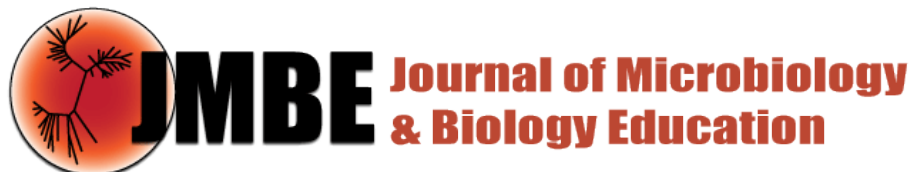

---

## Supplemental Materials

for

### Communicating Microbiology Concepts from Multiple Contexts through Poster Presentations

Amy Borello Gruss\*

*Department of Civil and Construction Engineering, Kennesaw State University,  
Kennesaw, GA 30144*

## Table of Contents

(Total pages: 3)

Appendix 1: Suggested reading list: microbiology-oriented books

Appendix 2: Course project rubric

\*Corresponding author. Mailing address:

1100 South Marietta Parkway, Building L,  
Marietta, GA 30060. Phone: 678-915-7262.

E-mail: [agruss@kennesaw.edu](mailto:agruss@kennesaw.edu).

Received: 31 July 2017, Accepted: 1 September 2017,

Published: 30 March 2018.

©2018 Author(s). Published by the American Society for Microbiology. This is an Open Access article distributed under the terms of the Creative Commons Attribution-Noncommercial-NoDerivatives 4.0 International license (<https://creativecommons.org/licenses/by-nc-nd/4.0/>) and <https://creativecommons.org/licenses/by-nc-nd/4.0/legalcode>), which grants the public the nonexclusive right to copy, distribute, or display the published work.

APPENDIX 1: Suggested reading list: microbiology-oriented books

1. *Bacteria and Bayonets: The Impact of Disease in American Military History* – David Petriello
2. *The Demon Under the Microscope: From Battlefield Hospitals to Nazi Labs, One Doctor's Heroic Search for the World's First Miracle Drug* – Thomas Hager
3. *Eye of the Beholder: Johannes Vermeer, Antoni van Leeuwenhoek, and the Reinvention of Seeing* – Laura J. Snyder
4. *The Genius Within: Discovering the Intelligence of Every Living Thing* – Frank T. Vertosick, Jr.
5. *The Ghost Map: The Story of London's Most Terrifying Epidemic – and How It Changed Science, Cities, and the Modern World* – Steven Johnson
6. *Guns, Germs, & Steel: The Fates of Human Societies* – Jared M. Diamond
7. *I Contain Multitudes: The Microbes Within Us and a Grand View of Life* – Ed Yong
8. *Lab 257: The Disturbing Story of the Government's Secret Germ Laboratory* – Michael C. Carroll
9. *Missing Microbes: How the Overuse of Antibiotics is Fueling Our Modern Plagues* – Martin J. Blaser
10. *The Mold in Dr. Florey's Coat: The Story of the Penicillin Miracle* – Eric Lax

Alternatively, you may also choose a book of your choice not listed above if you receive prior approval by the instructor.

APPENDIX 2: Course project rubric

| <b>Environmental Engineering Microbiology: Course Project Rubric</b> |                                                                                                                         |                                                                                                                                |                                                                                                                  |                                                                                                      |
|----------------------------------------------------------------------|-------------------------------------------------------------------------------------------------------------------------|--------------------------------------------------------------------------------------------------------------------------------|------------------------------------------------------------------------------------------------------------------|------------------------------------------------------------------------------------------------------|
|                                                                      | <b>(4 points each)</b>                                                                                                  | <b>(3 points each)</b>                                                                                                         | <b>(2 points each)</b>                                                                                           | <b>(1 point each)</b>                                                                                |
| <b>Visual Requirements</b>                                           | Poster is visually clear from a distance                                                                                | Poster is fairly readable from a distance                                                                                      | Portions of the poster are not readable from a distance                                                          | Poster is difficult to read and is not clear from a distance                                         |
|                                                                      | Design and layout is excellent and creative                                                                             | Design and layout is visually appealing                                                                                        | Design and layout is standard and commonplace                                                                    | Design and layout is not visually appealing and does not show creativity                             |
|                                                                      | Grammar and spelling is accurate                                                                                        | Minor mistakes with grammar and/or spelling                                                                                    | Many punctuation, spelling, grammar, etc. errors                                                                 | Numerous errors throughout the text                                                                  |
|                                                                      | Graphs, Charts, and Figures clearly enhance the information                                                             | Graphical images are used to clarify poster information                                                                        | Little use of graphics to supplement text                                                                        | Irrelevant use of graphics or no graphics used at all                                                |
|                                                                      | <i>TOTAL:</i>                                                                                                           | <i>TOTAL:</i>                                                                                                                  | <i>TOTAL:</i>                                                                                                    | <i>TOTAL:</i>                                                                                        |
| <b>Subject Matter Requirements</b>                                   | Selected an innovative thesis based on the chosen book                                                                  | Selected a good thesis based on the chosen book                                                                                | The thesis does not adequately relate to the chosen book                                                         | Poorly chosen topic that does not relate well to the book                                            |
|                                                                      | Developed and expanded upon the thesis by clearly relating it to environmental engineering                              | The topic adequately relates to environmental engineering                                                                      | Only a small portion of the topic selected from the book relates to environmental engineering                    | Thesis is not well developed and is unclear how it relates to environmental engineering microbiology |
|                                                                      | Selected additional sources that enhance the thesis and clearly show how environmental engineering relates to the topic | Selected additional sources that adequately expand upon the thesis and show how environmental engineering relates to the topic | Additional sources do not adequately relate to the topic selected and do not relate to environmental engineering | Sources do not relate well to the topic or there are additional sources at all                       |
|                                                                      | Used course information to expand upon information found in the chosen book                                             | Used course information to confirm information found in the chosen book                                                        | Course information does not adequately relate to the chosen book                                                 | Course information inadequate or not utilized                                                        |
|                                                                      | <i>TOTAL:</i>                                                                                                           | <i>TOTAL:</i>                                                                                                                  | <i>TOTAL:</i>                                                                                                    | <i>TOTAL:</i>                                                                                        |
| <b>Presentation Requirements</b>                                     | Presented within the required time limit of 10-15 minutes                                                               | Presented 1-3 minutes over or under the time requirement                                                                       | Presentation length is too long or too short                                                                     | Inadequate presentation length                                                                       |
|                                                                      | Presented information eloquently in a clear order that enhances the subject matter                                      | Presented in a logical order that can easily be followed                                                                       | Difficulty presenting due to lack of organization in presentation                                                | Unable to follow presentation due to illogical order of presenting information                       |
|                                                                      | Nonverbal skills (eye contact, body language, mannerism) are exceptionally expressed                                    | Displayed adequate nonverbal skills                                                                                            | Displayed awkward nature during presentation                                                                     | Distracted during presentation and did not express adequate nonverbal communication                  |
|                                                                      | Answers all questions concisely and with clarity                                                                        | Able to answers all questions                                                                                                  | Unable to answer all questions                                                                                   | Does not adequately answer questions                                                                 |
|                                                                      | <i>TOTAL:</i>                                                                                                           | <i>TOTAL:</i>                                                                                                                  | <i>TOTAL:</i>                                                                                                    | <i>TOTAL:</i>                                                                                        |
| <b>Project Requirements</b>                                          | Utilized at least two peer-reviewed journal articles                                                                    | Utilized one peer-reviewed journal article                                                                                     | Did not utilize articles in peer-reviewed journals                                                               | Did not utilize supplementary sources                                                                |
|                                                                      | Utilized at least one news article that clearly related to the subject matter                                           | Utilized one news article that slightly related to the subject matter                                                          | News article did not relate to the subject matter                                                                | Did not utilize a news article                                                                       |
|                                                                      | Cited course information that enhanced the thesis of the project                                                        | Cited course/textbook information that related to the subject matter                                                           | Cited course information that did not relate to the subject matter                                               | Did not reference course information                                                                 |
|                                                                      | Listed all references used on the poster in APA formatting                                                              | Listed some of the references used in APA formatting                                                                           | Cited references incorrectly                                                                                     | Did not cite references on the poster                                                                |
|                                                                      | <i>TOTAL:</i>                                                                                                           | <i>TOTAL:</i>                                                                                                                  | <i>TOTAL:</i>                                                                                                    | <i>TOTAL:</i>                                                                                        |
|                                                                      |                                                                                                                         |                                                                                                                                | <b>OVERALL SCORE: _____ out of 64</b>                                                                            |                                                                                                      |
